# Supplementary material
Source: PubMed Central journal article supplement (PMC3008280)
Supplement: supp_9_12_1913__1.pdf [file supp_9_12_1913__1.pdf]

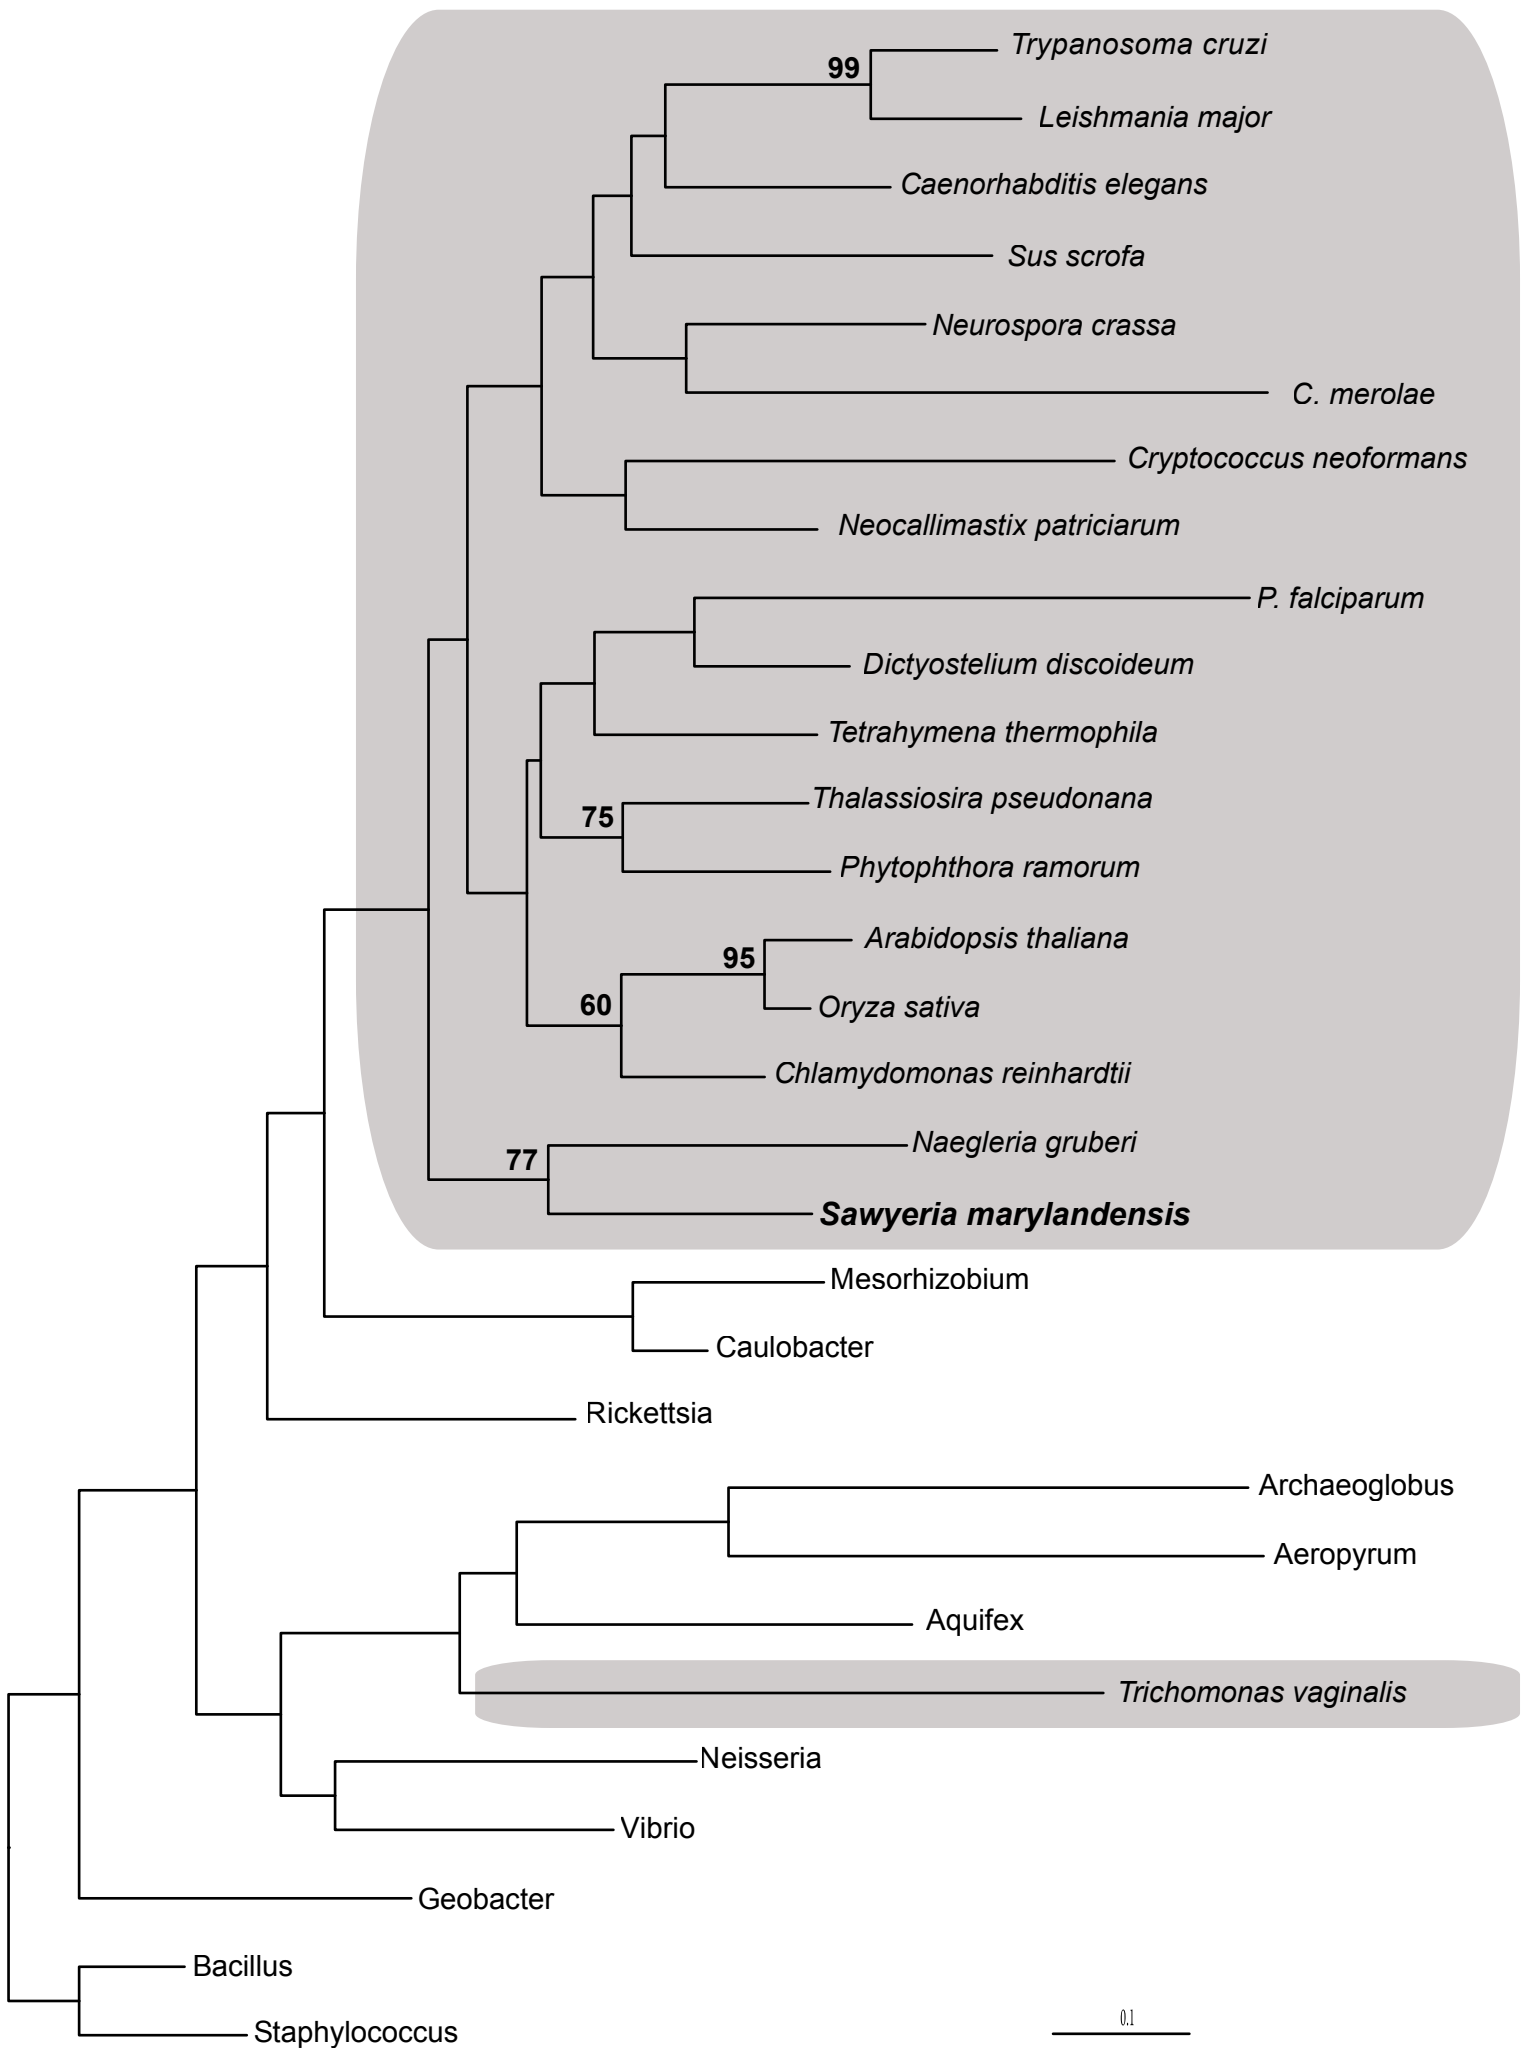

**Fig. S1-SCSalpha ML tree**

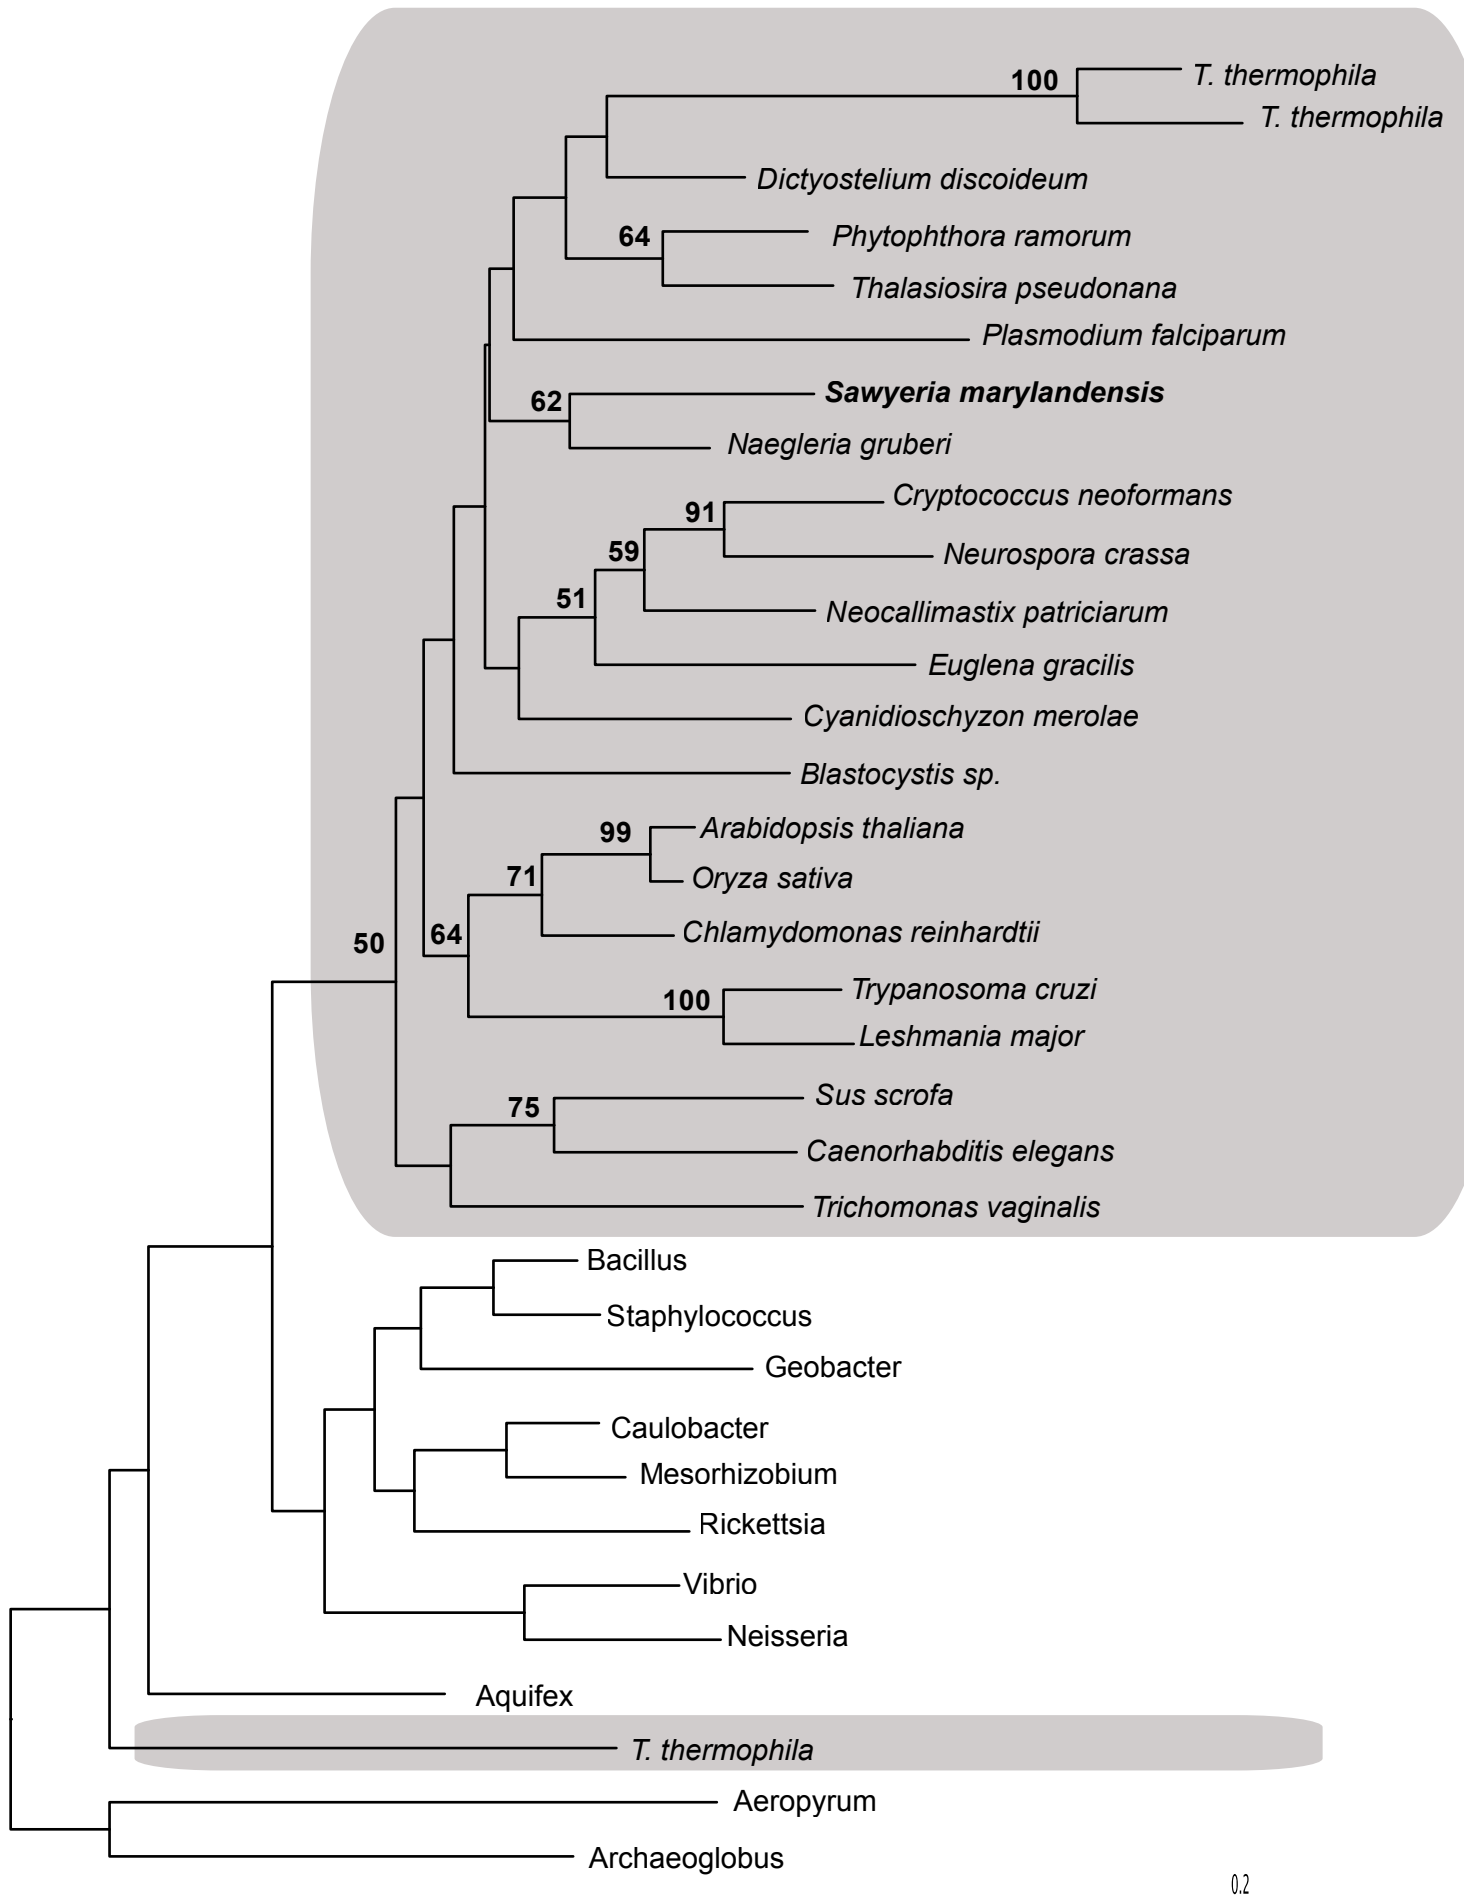

0.2

**Fig. S2-SCSbeta ML tree**

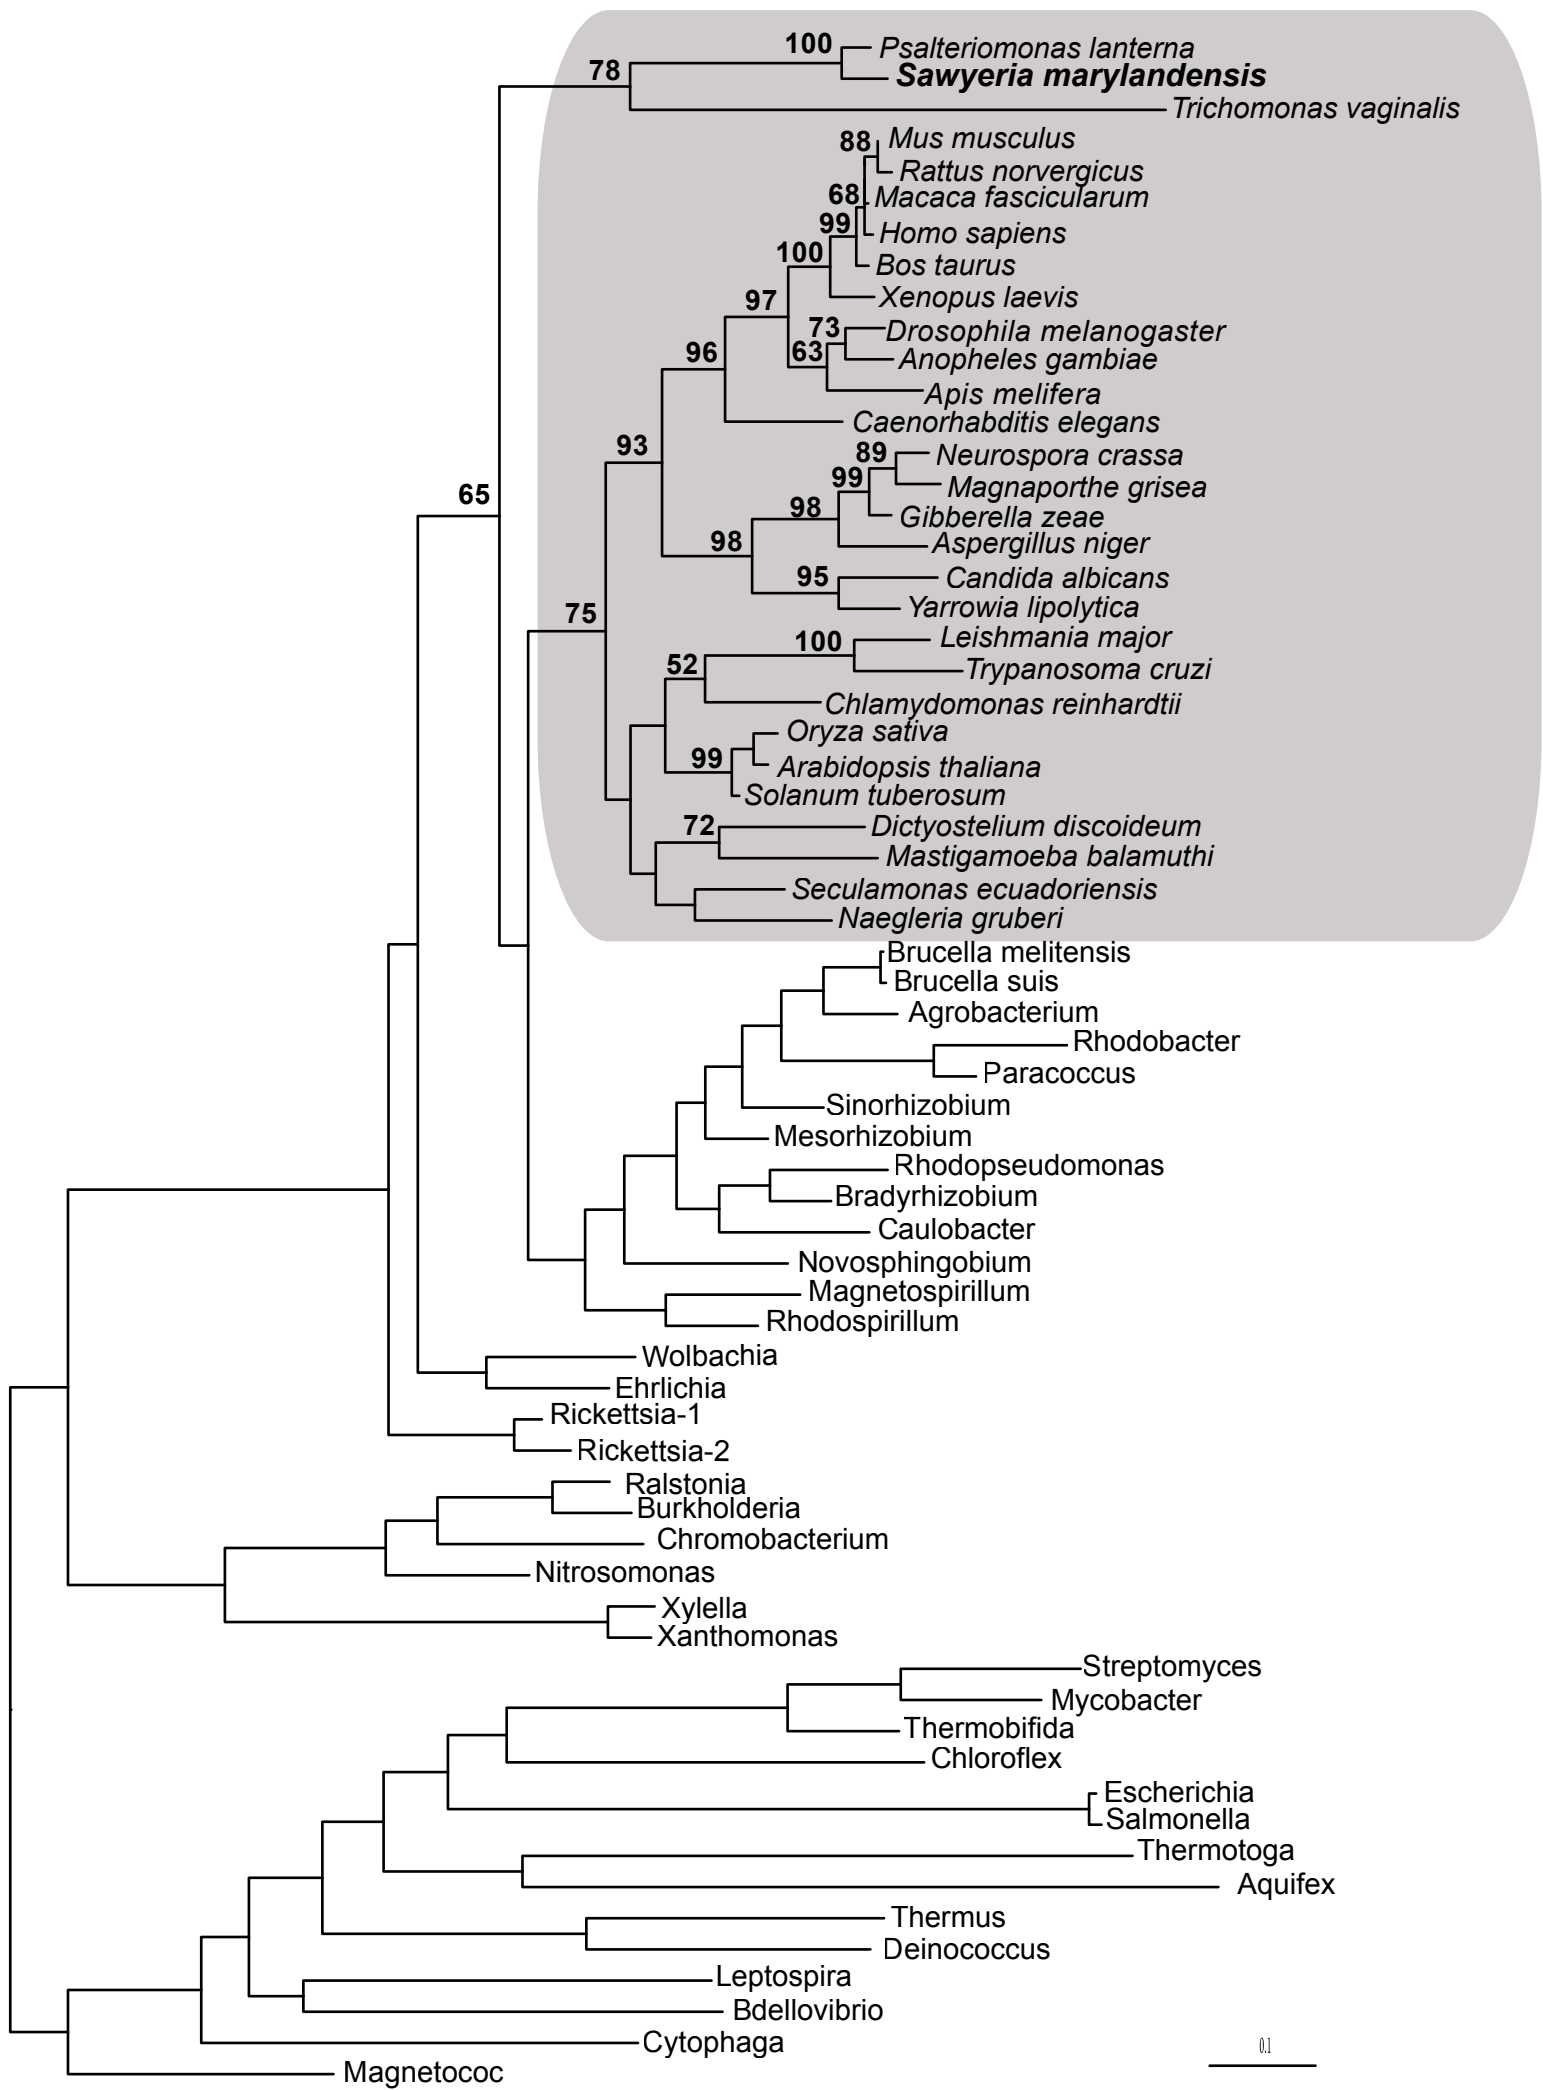

**Fig. S3-Nuof ML tree**

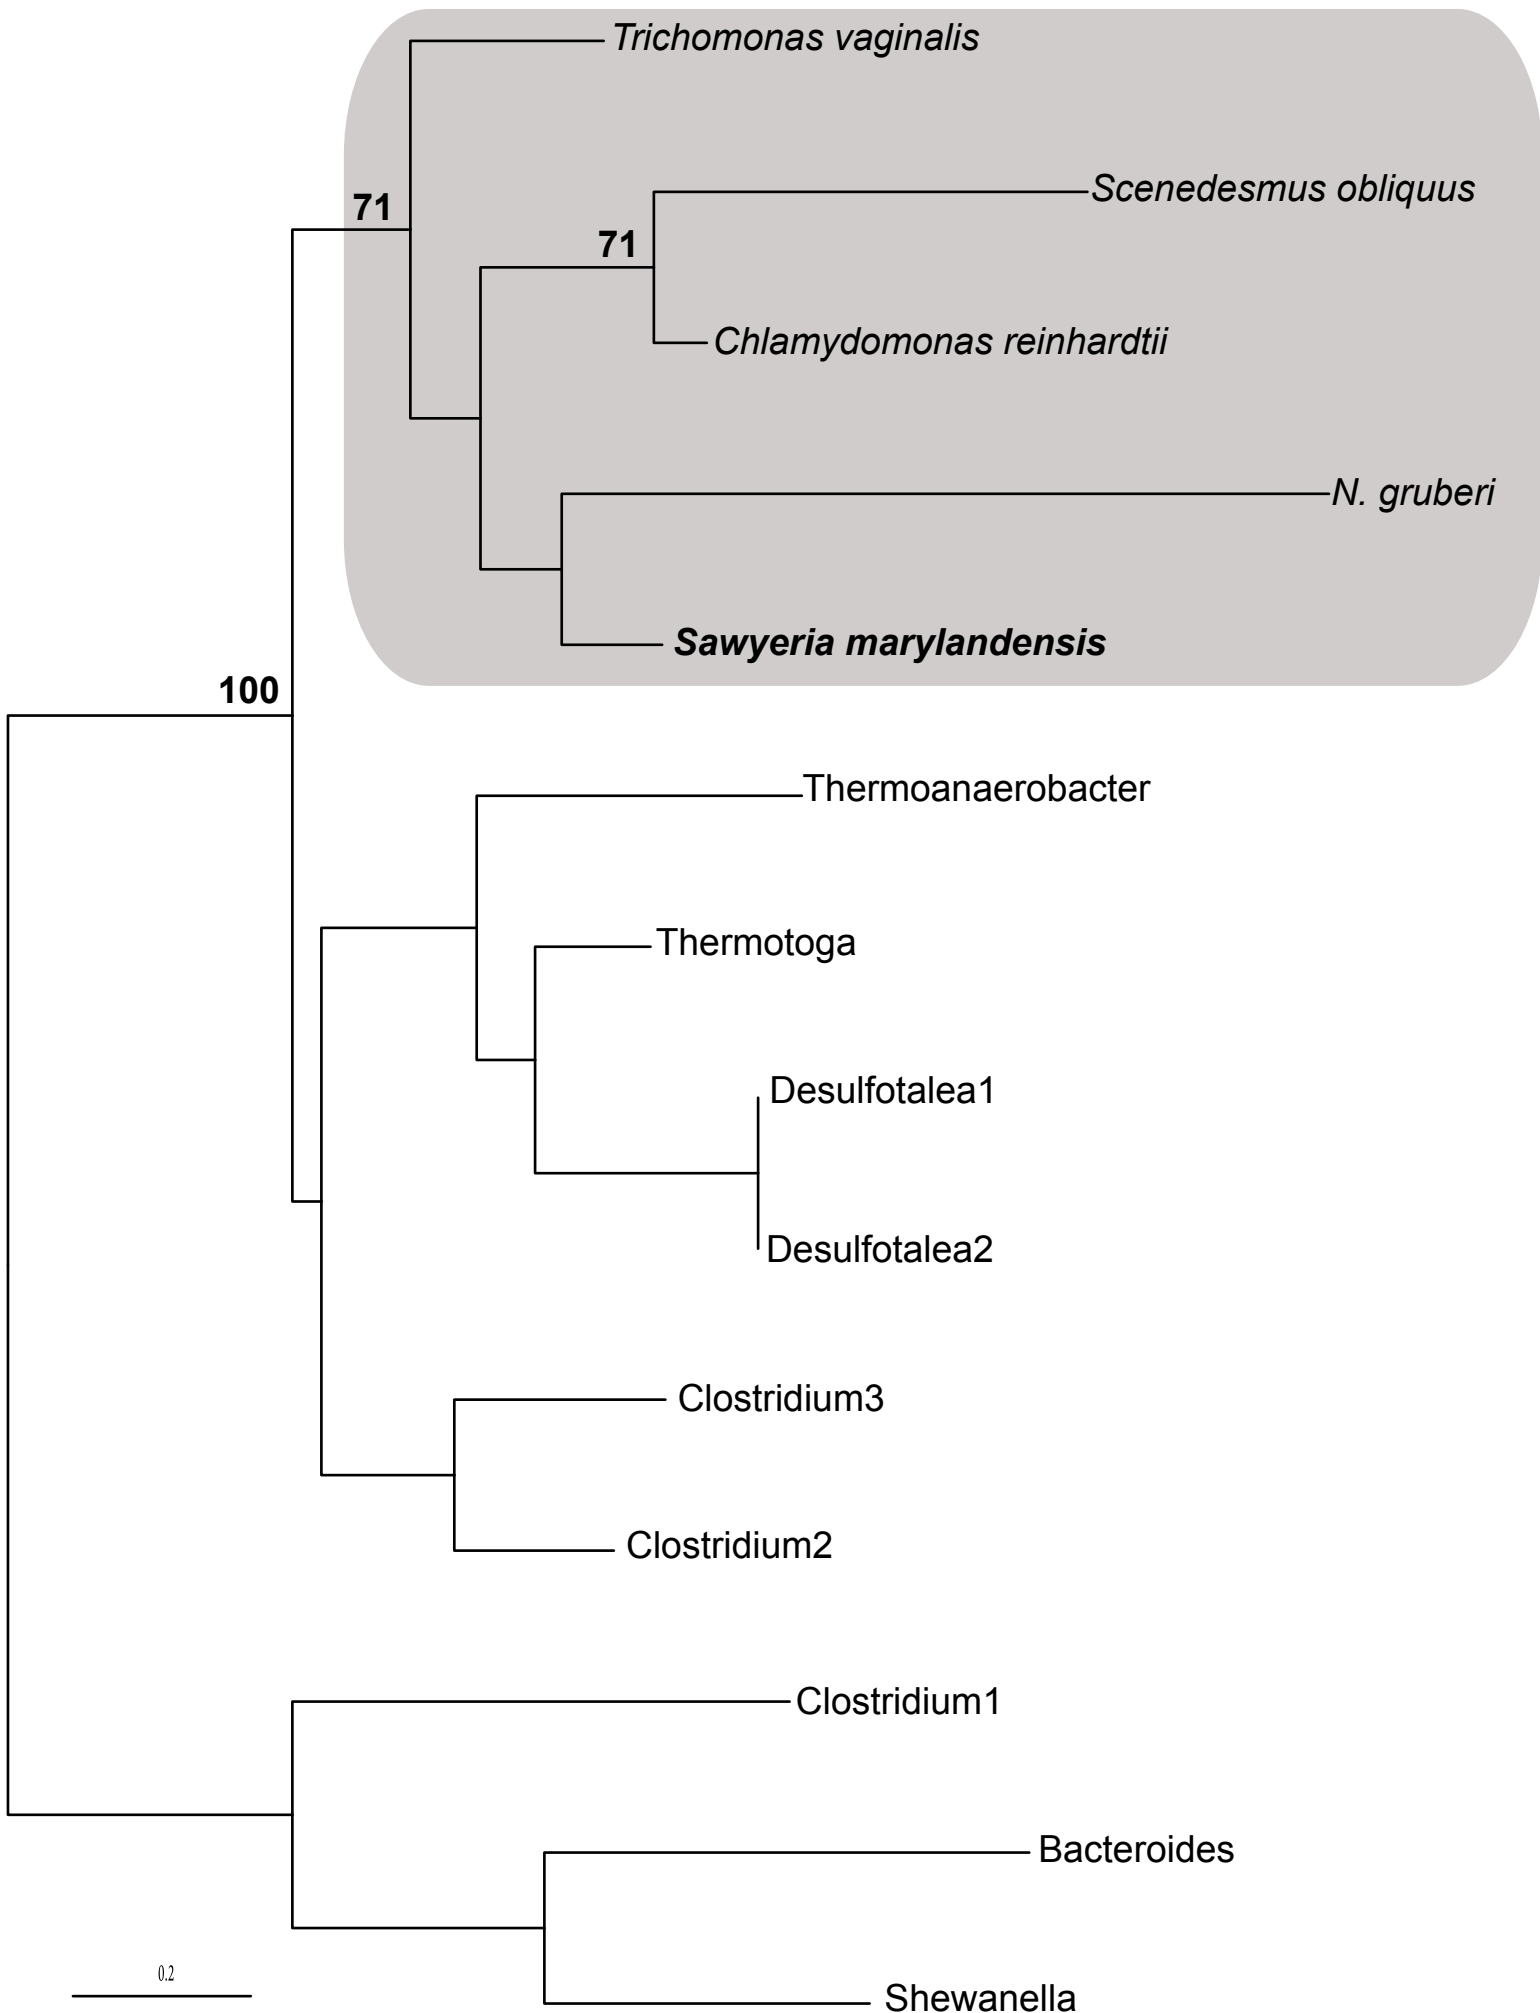

**Fig. S4-HydG ML tree**

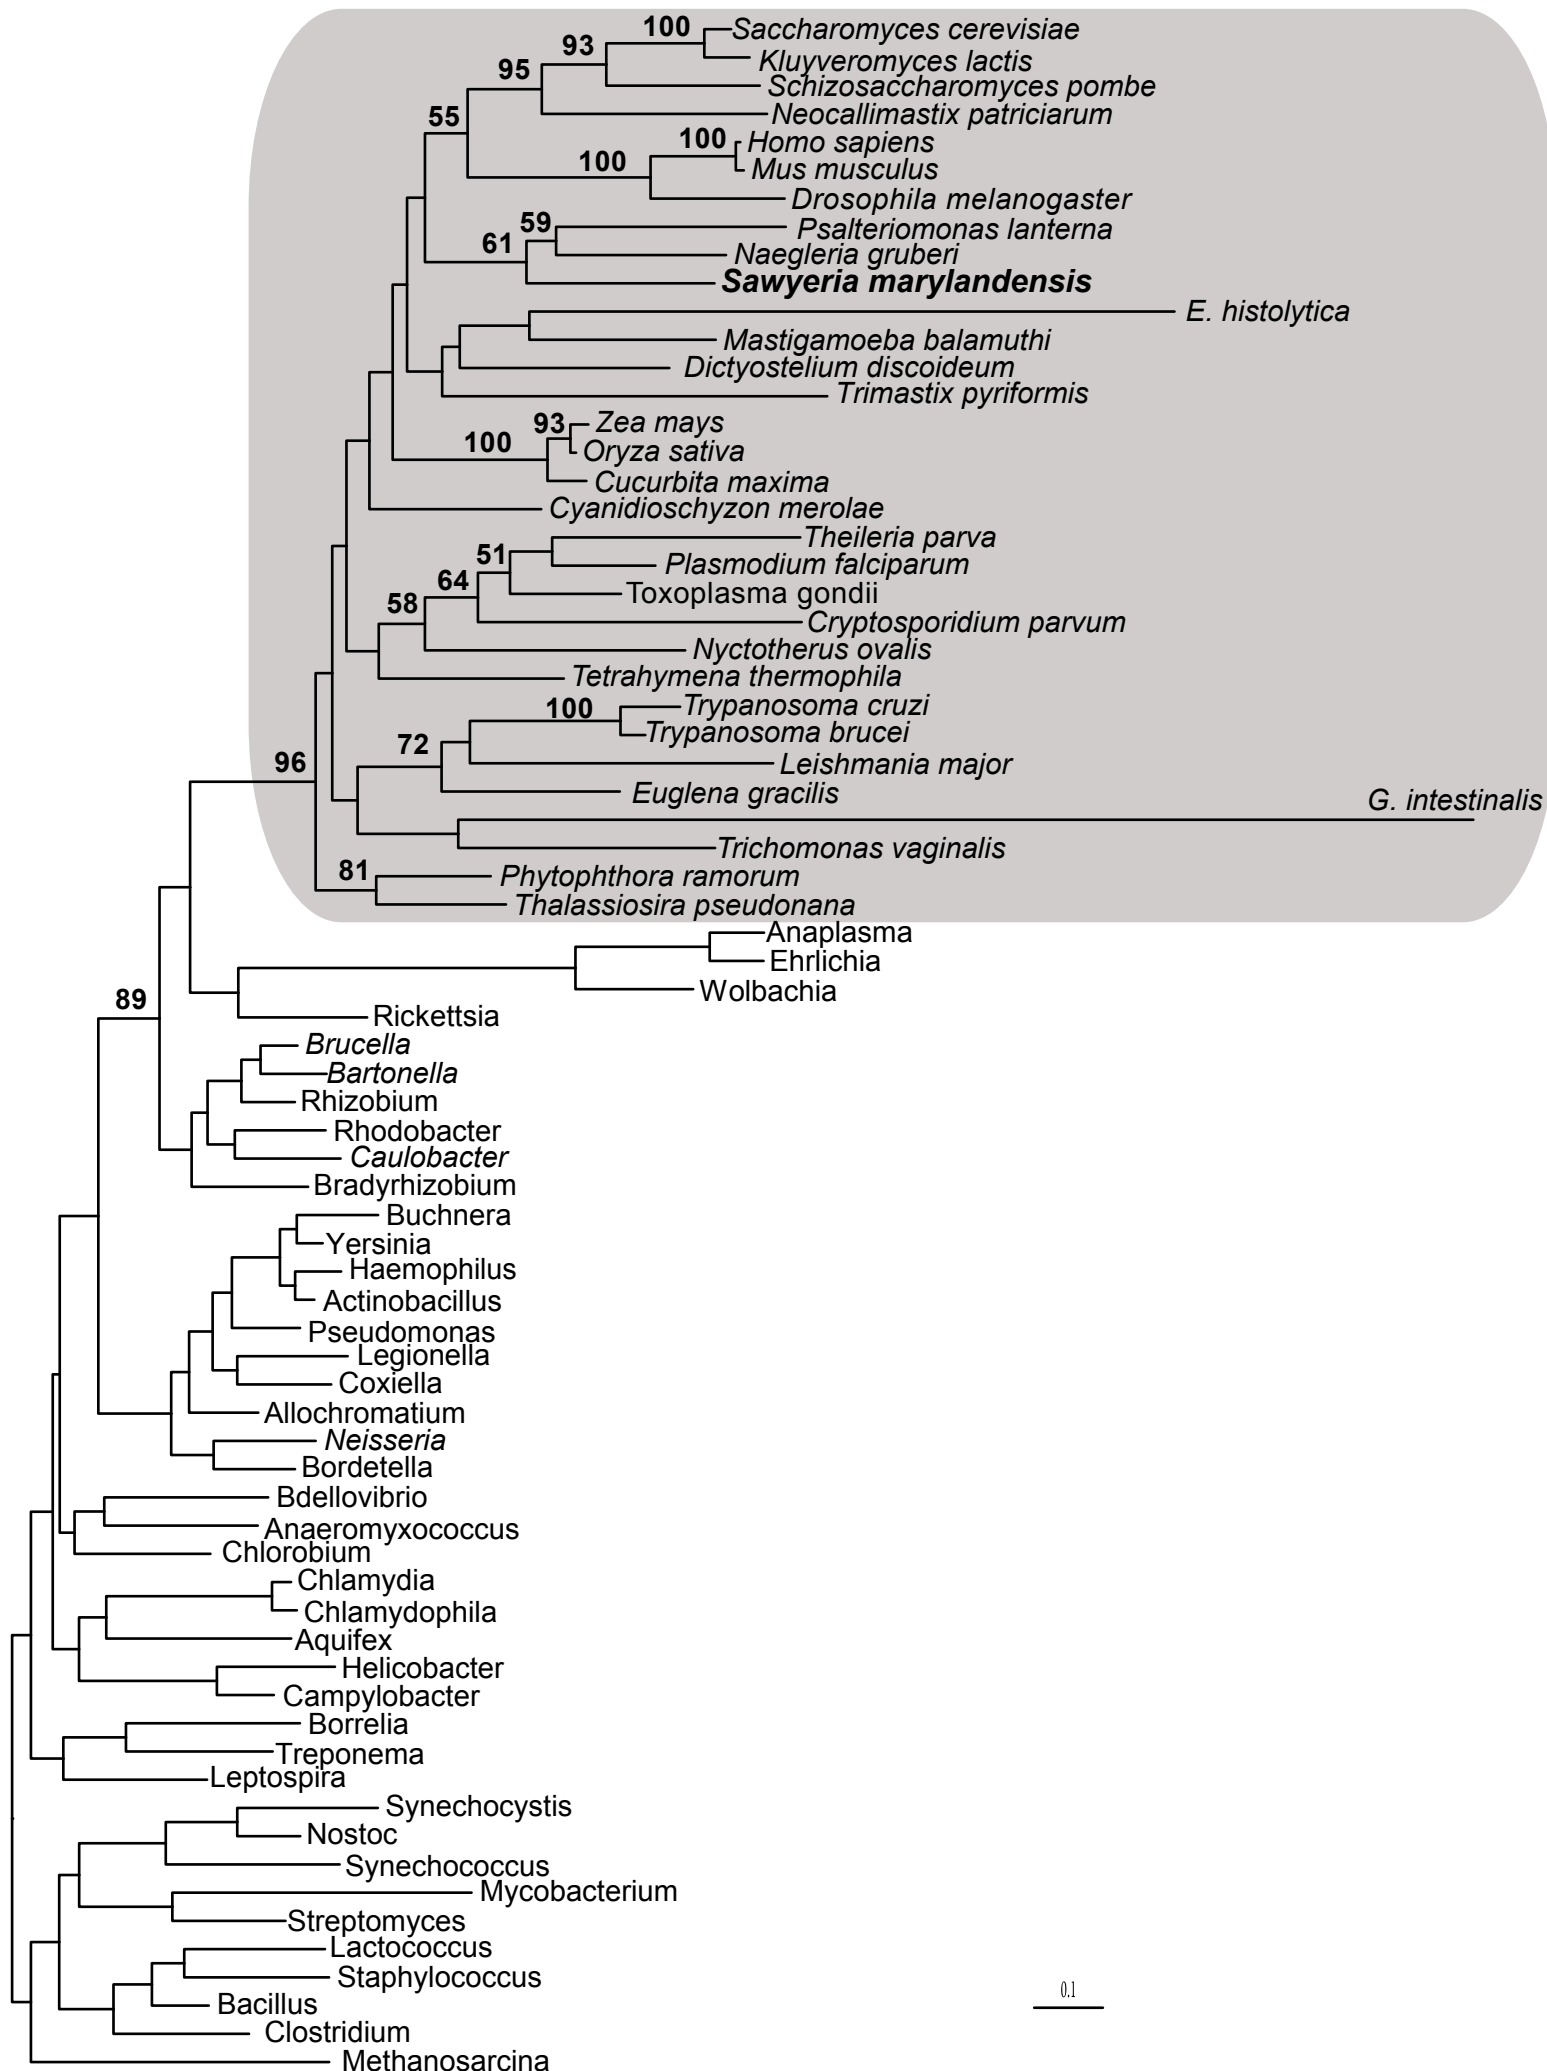

**Fig. S5-cpn60 ML tree**

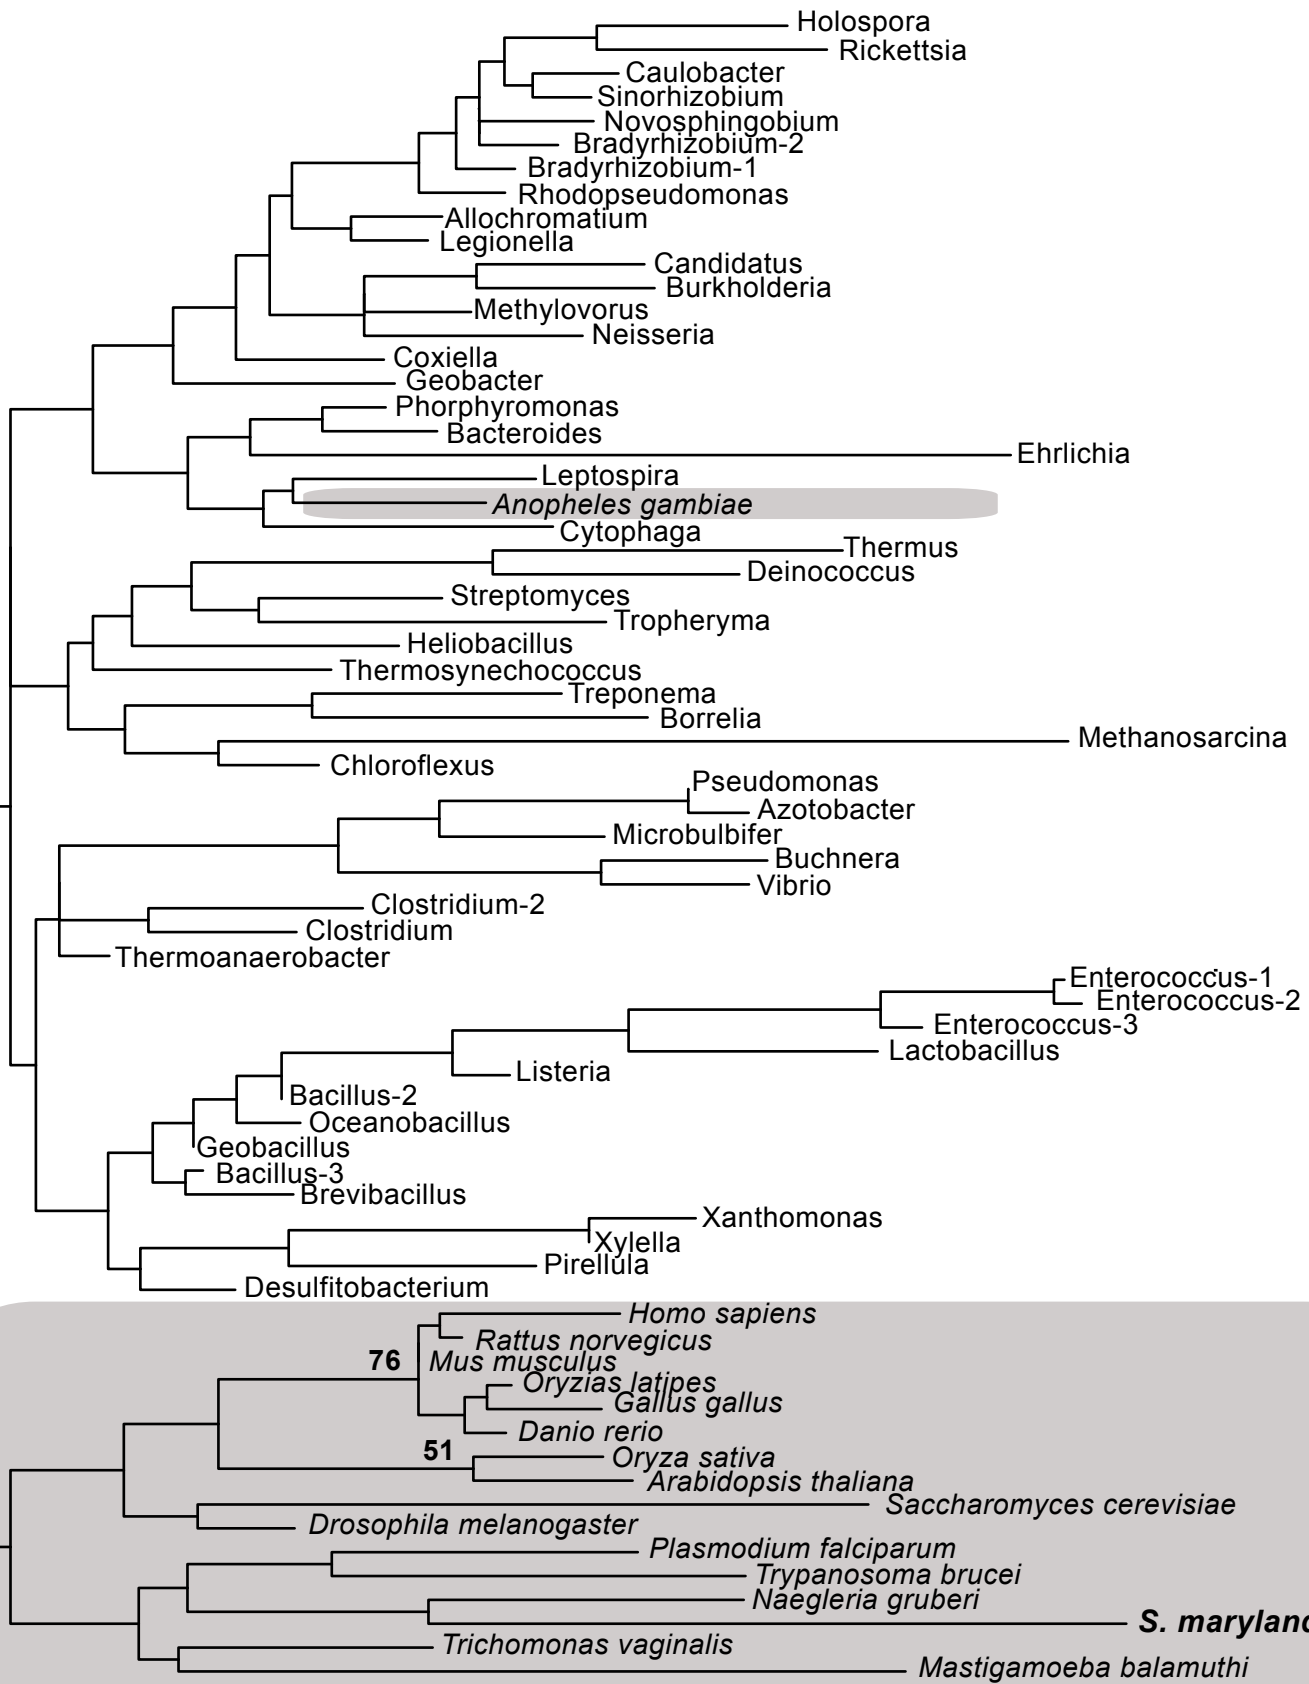

0.1

Fig. S6-Cpn10 ML tree

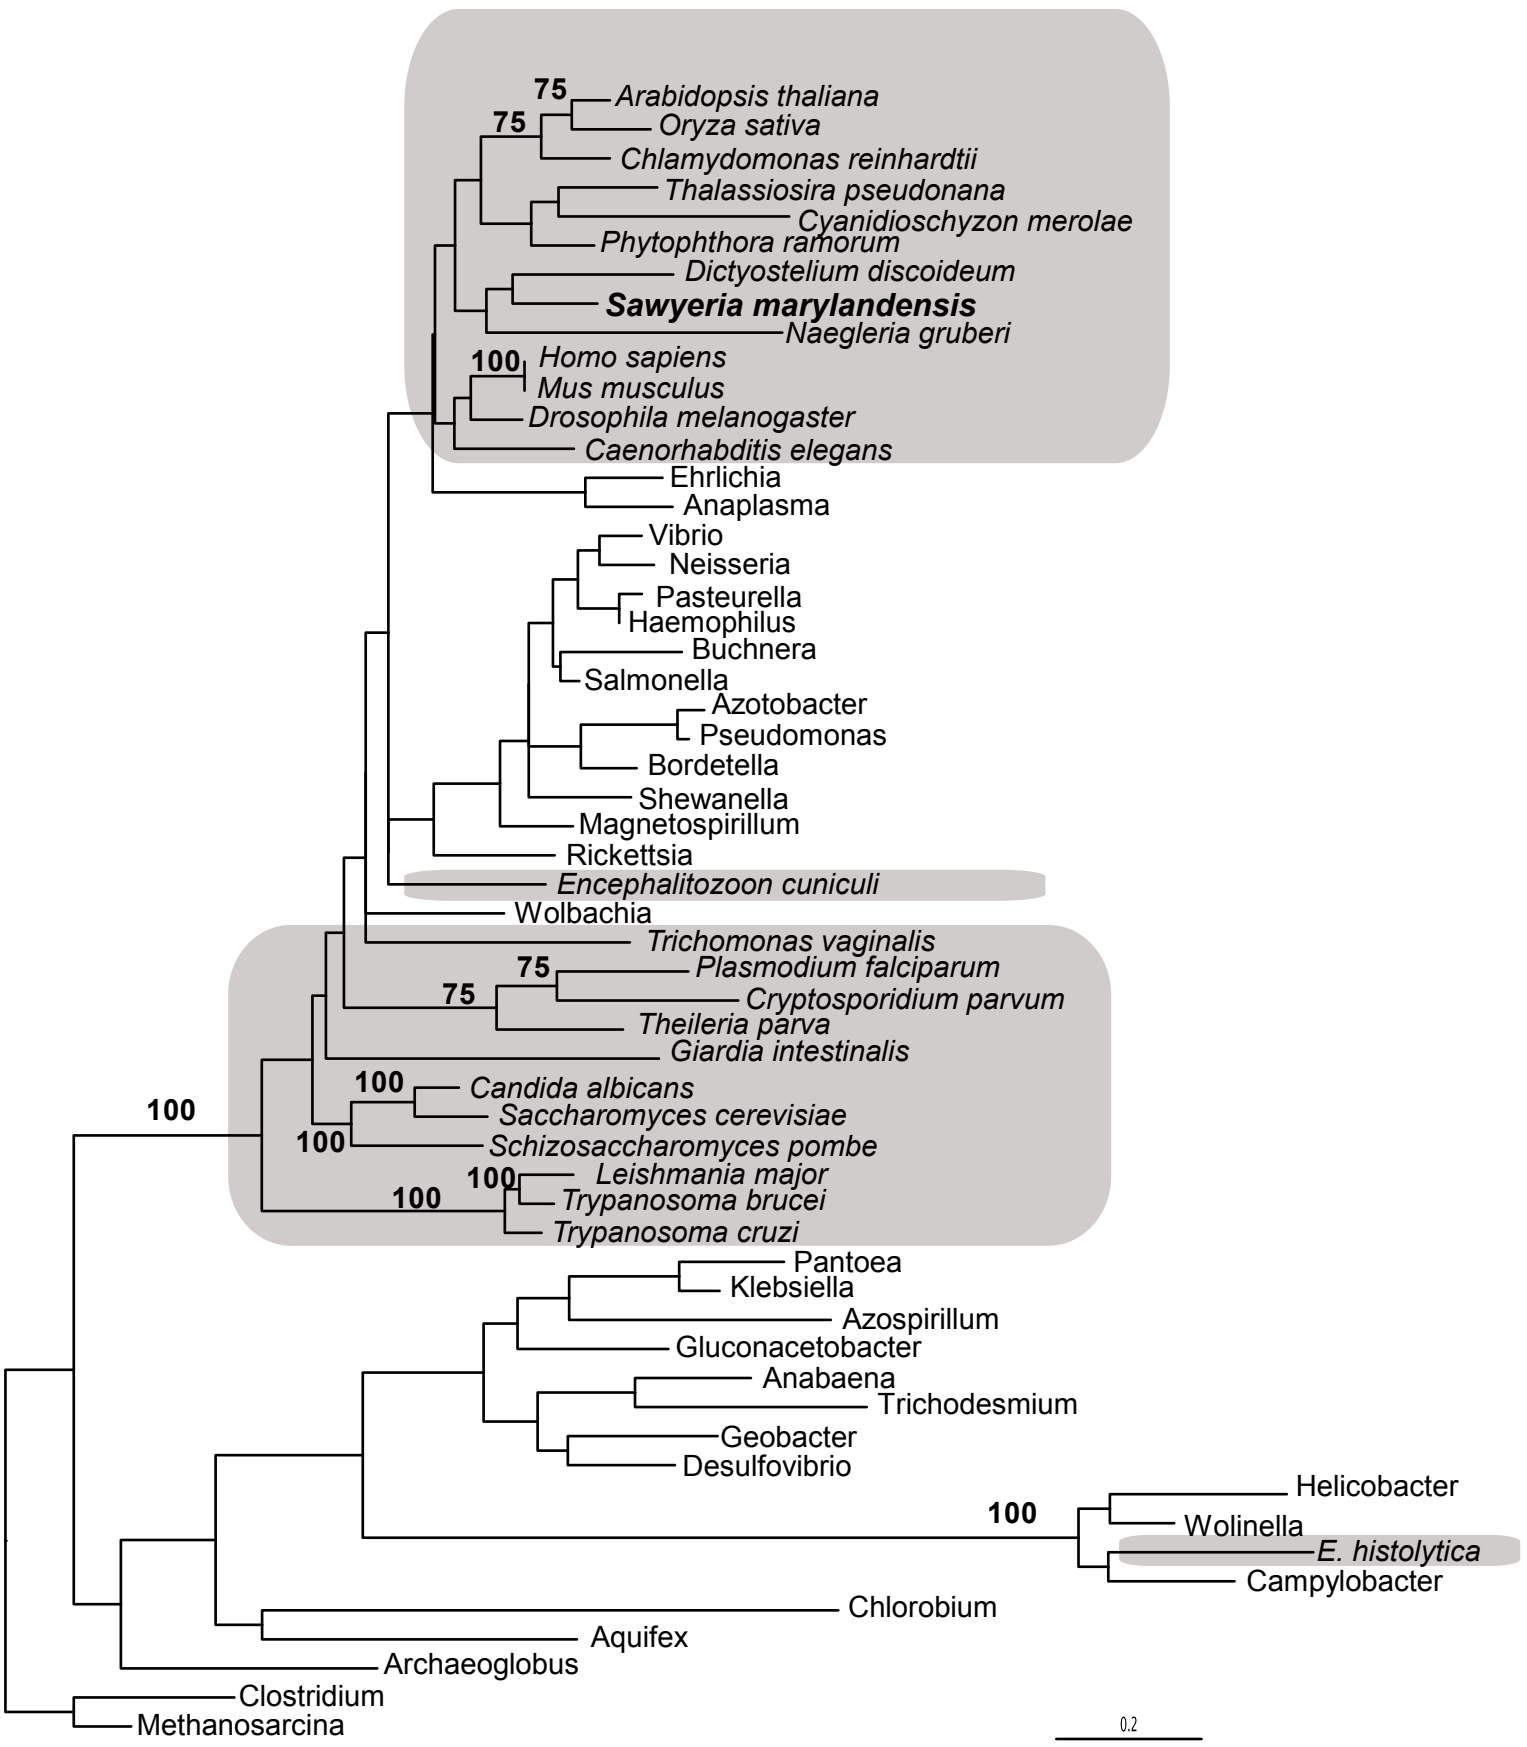

**Fig. S7-18S ML tree**

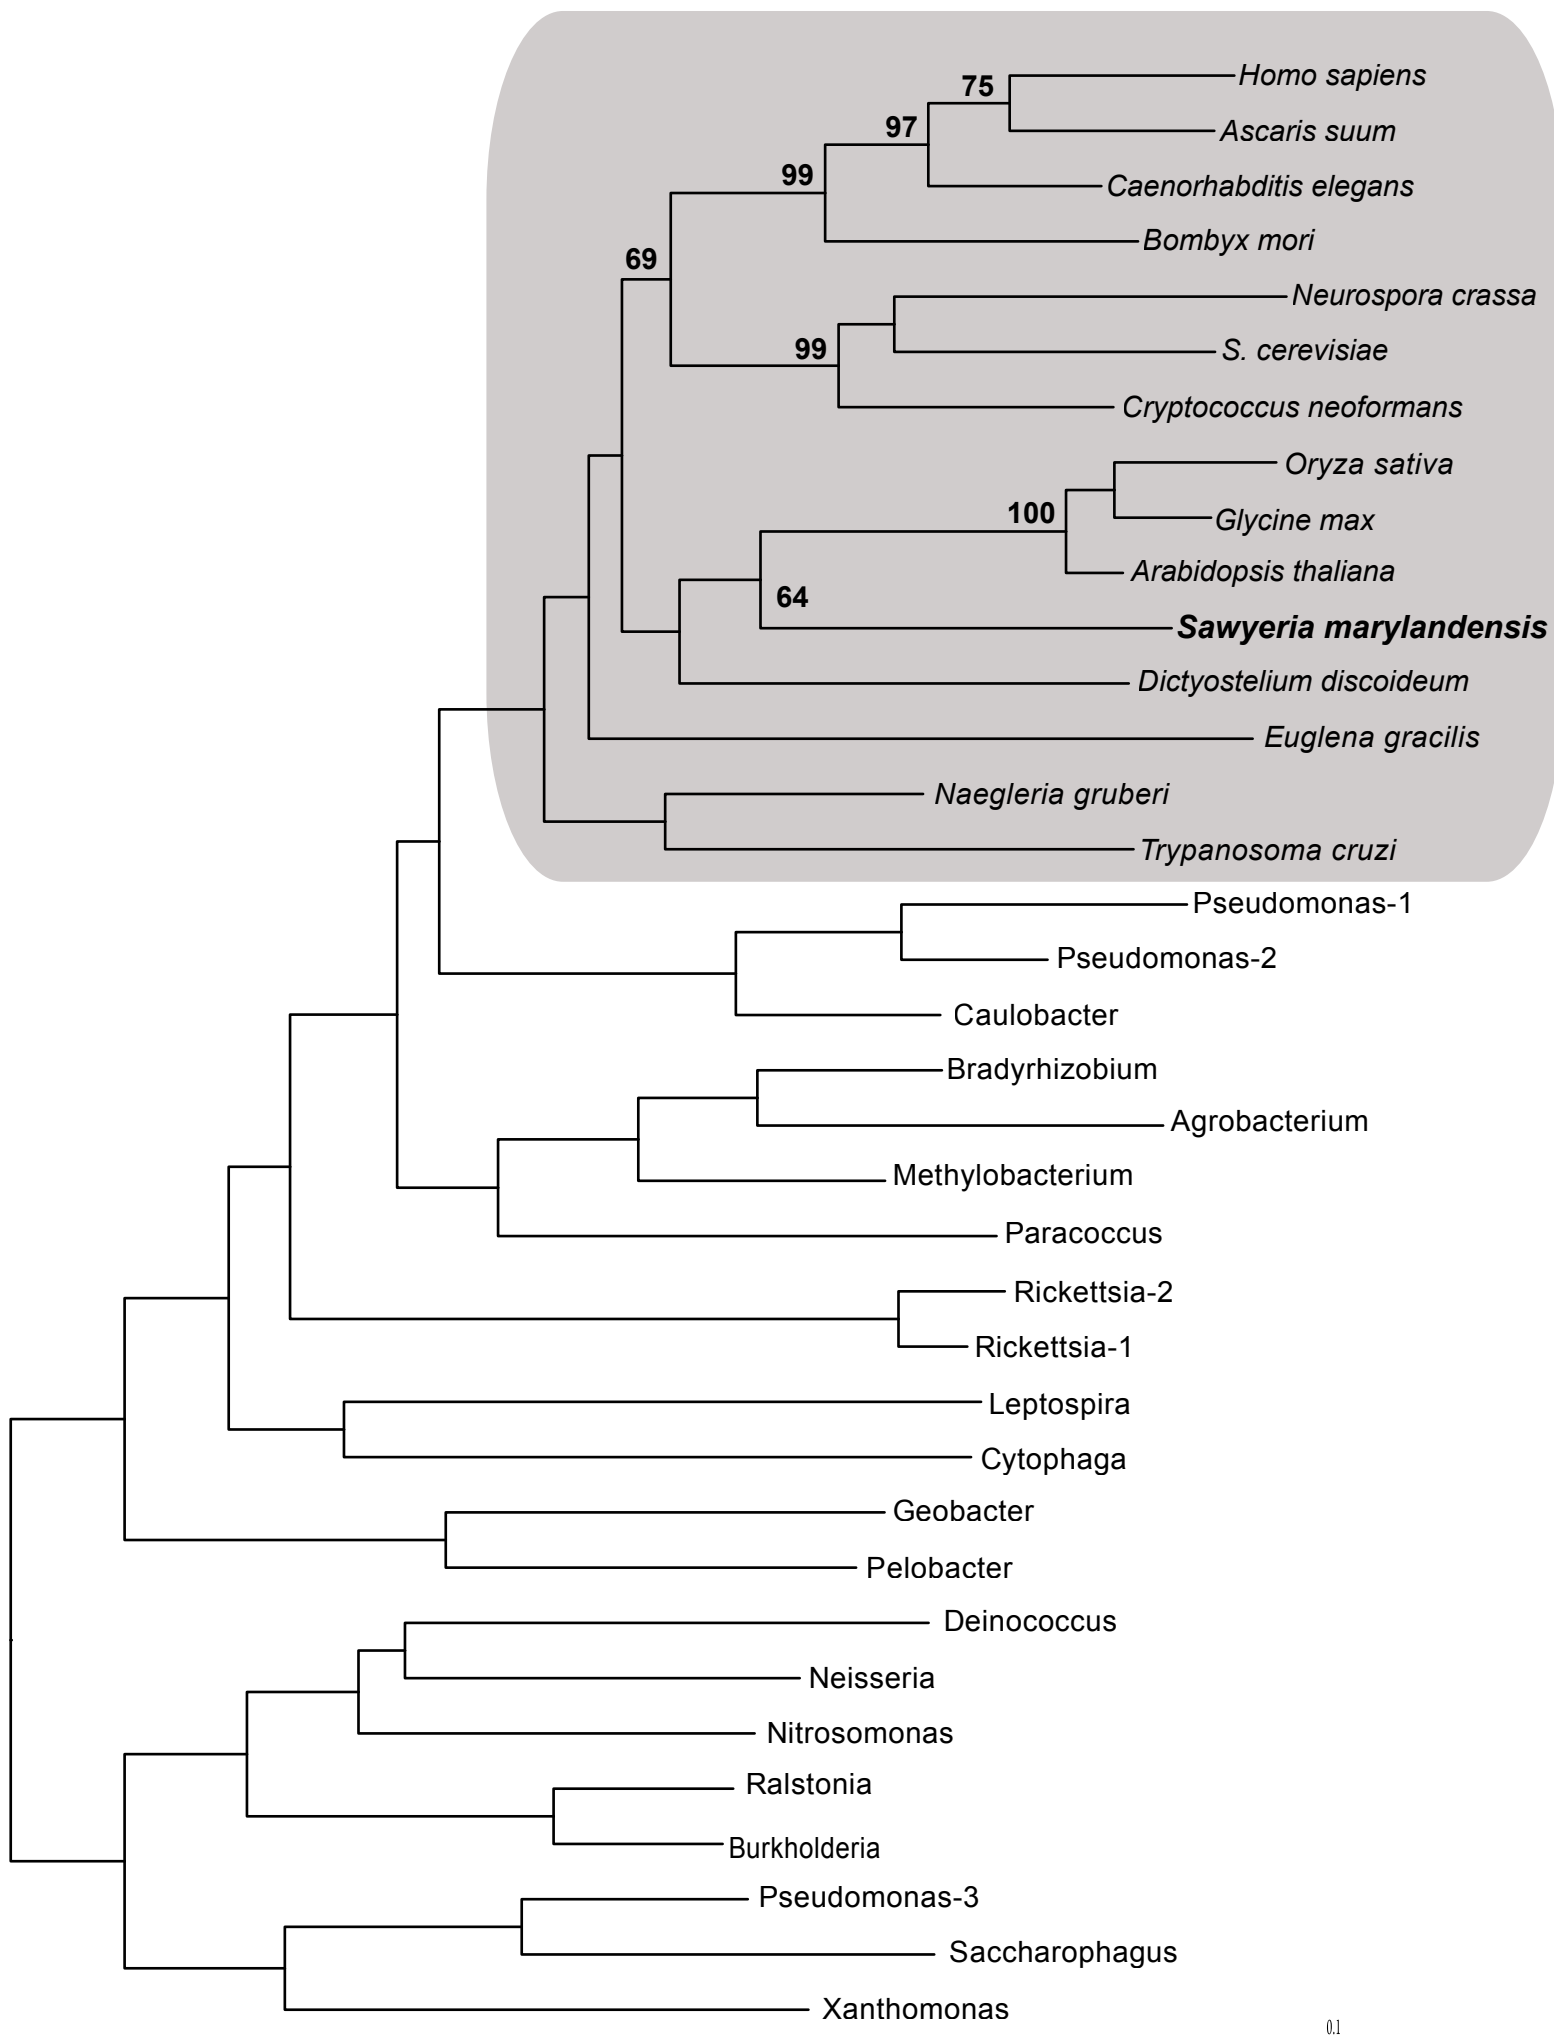

**Fig. S8-Dihydrolipoamide dehydrogenase ML tree**



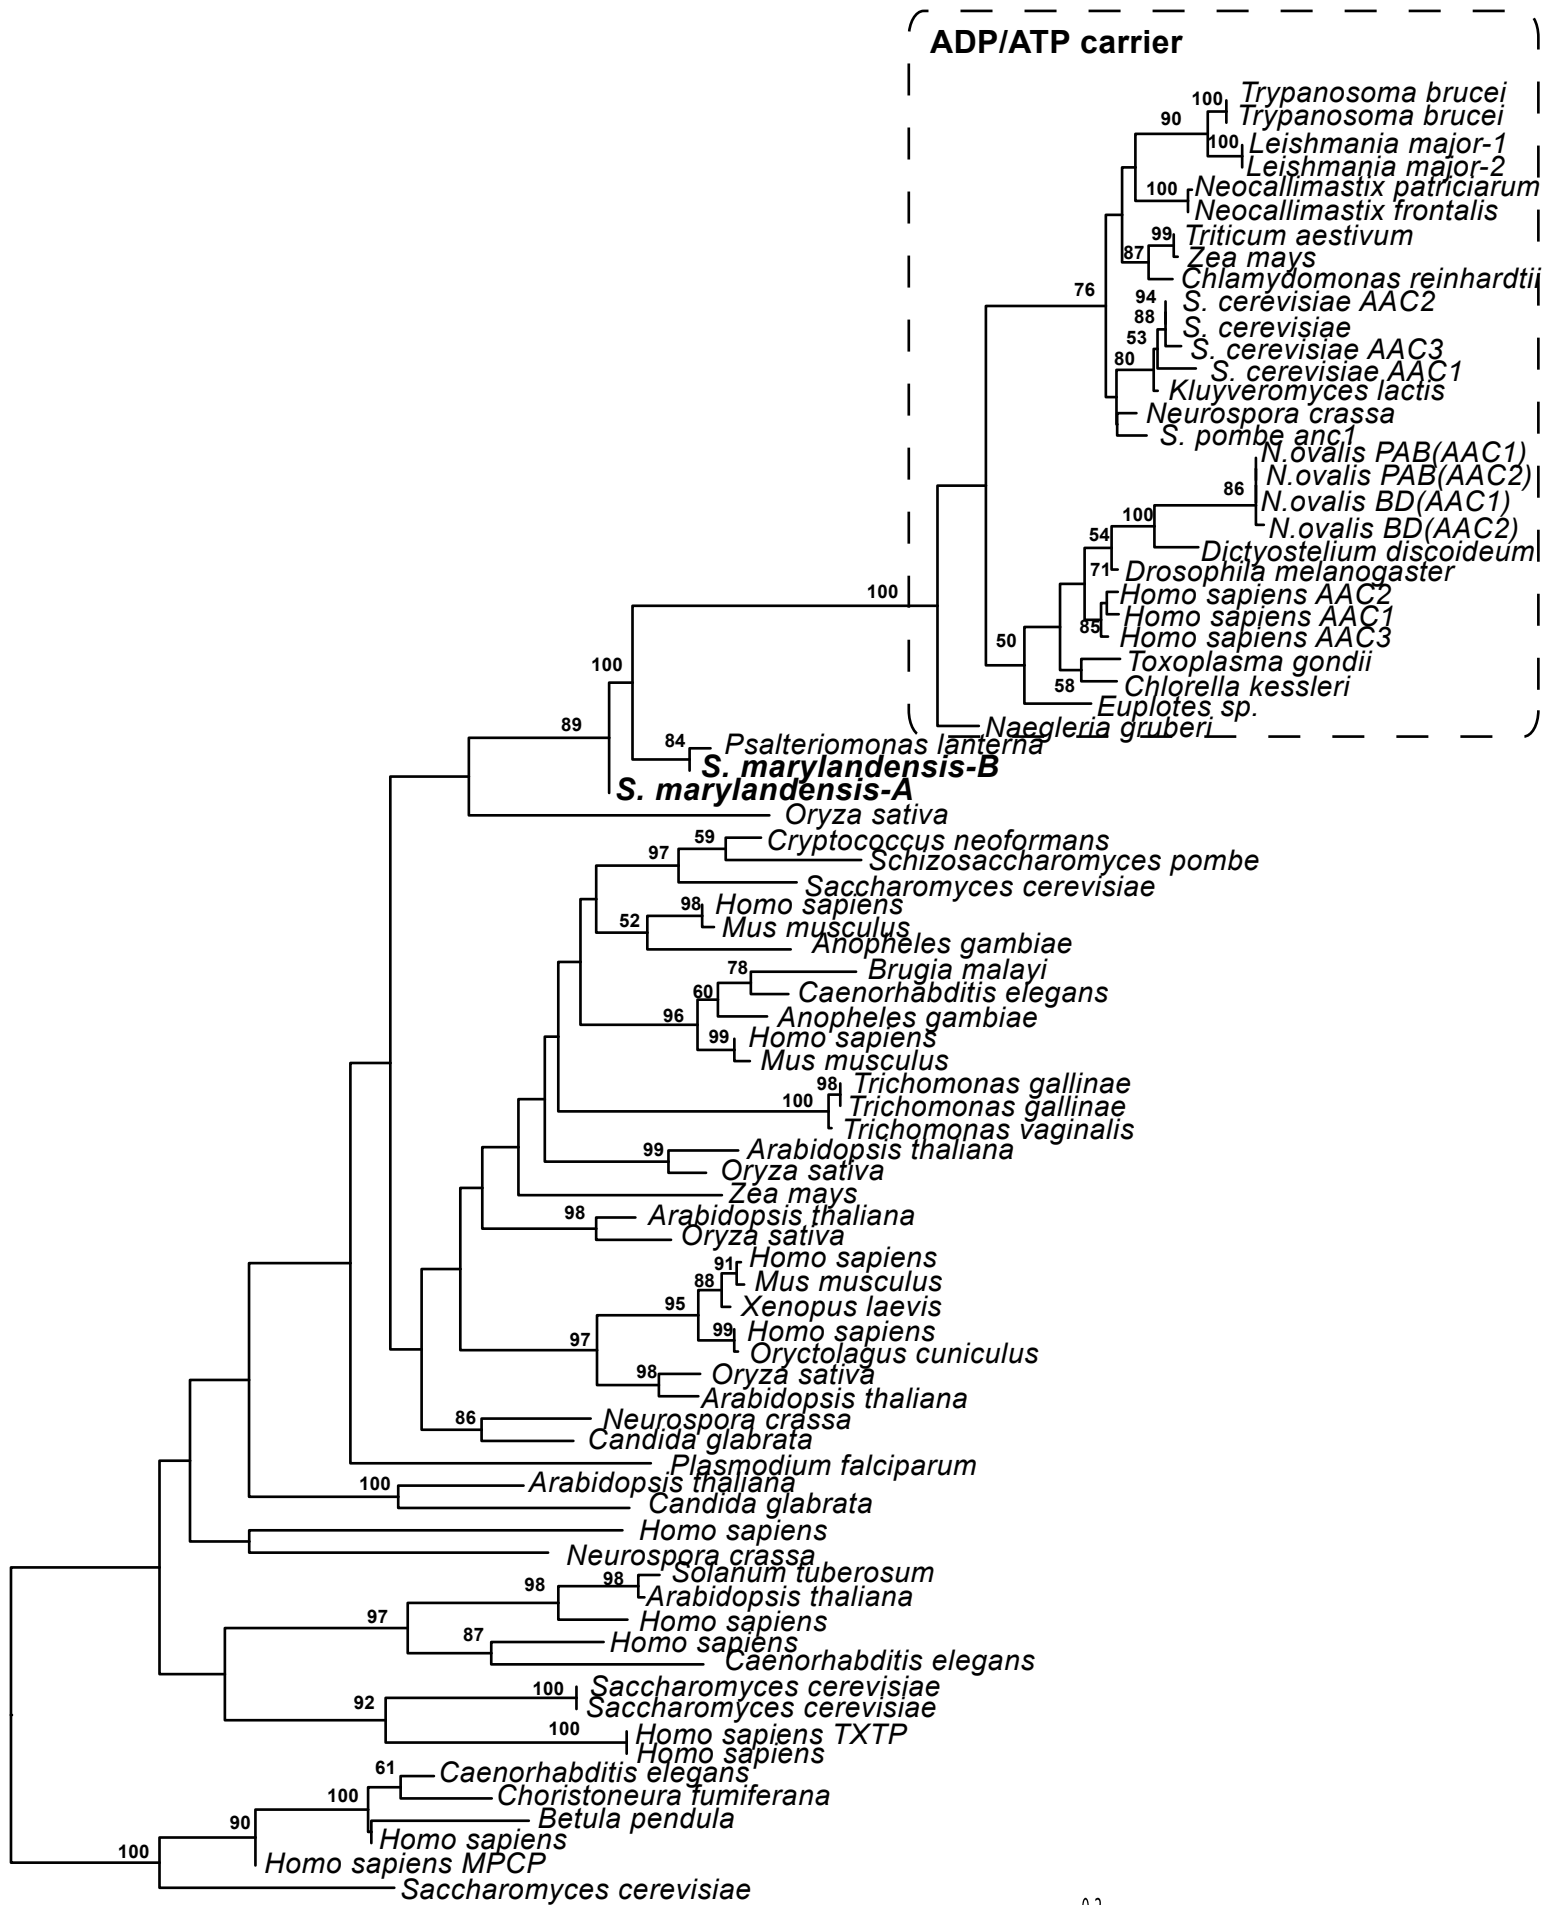

**Fig. S9-ACC**
